# Supplementary material for: LncRNA HOXA-AS2 promotes the progression of prostate cancer via targeting miR-509-3p/PBX3 axis
Source: PubMed Central journal article supplement (PMC7426630; doi:10.1042/bsr20193287), 2020-08-13
Supplement: BSR-2019-3287_supp.pdf [file BSR-2019-3287_supp.pdf]

A

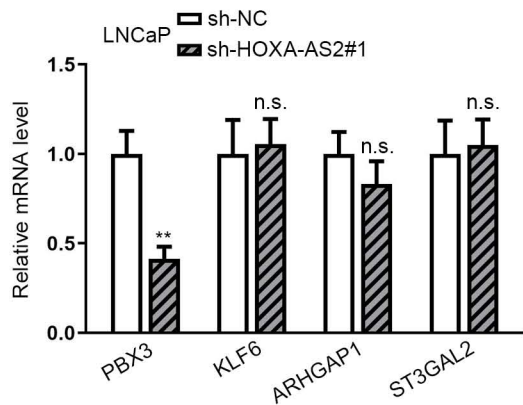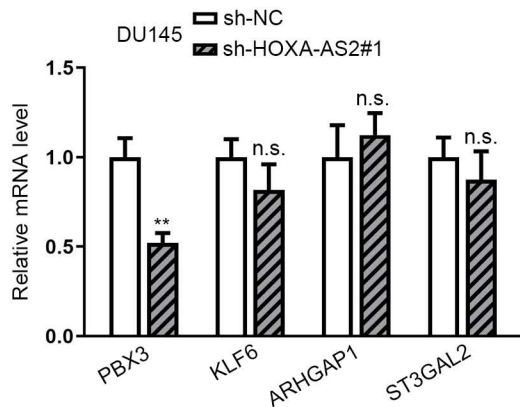

B

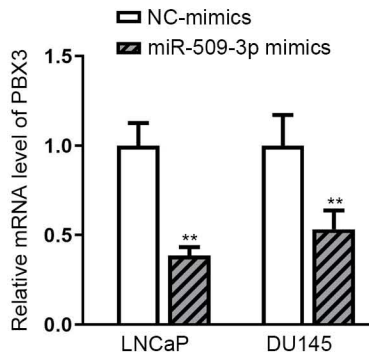

C

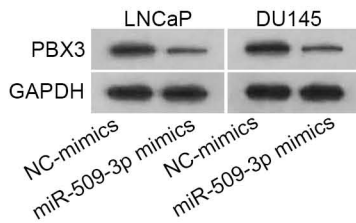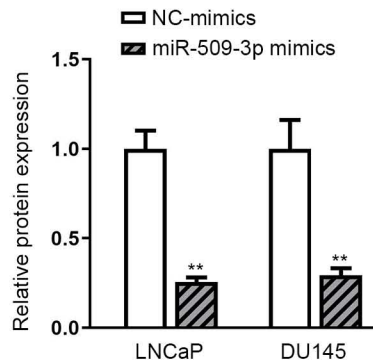

**Figure S1. MiR-509-3p inhibited PBX3 expression in prostate cancer cells.** A. The expressions of four candidate targets of miR-509-3p in cells transfected with sh-HOXA-AS2#1 or sh-NC. B. qRT-PCR data of PBX3 mRNA level in LNCaP and DU145 cells transfected with miR-509-3p mimics or NC mimics. C. Western blot analysis of PBX3 protein in response to miR-509-3p overexpression. All results were shown as the mean  $\pm$  SD. \*\*P < 0.01, n.s.: no significance.
